# The American Journal of Psychiatry

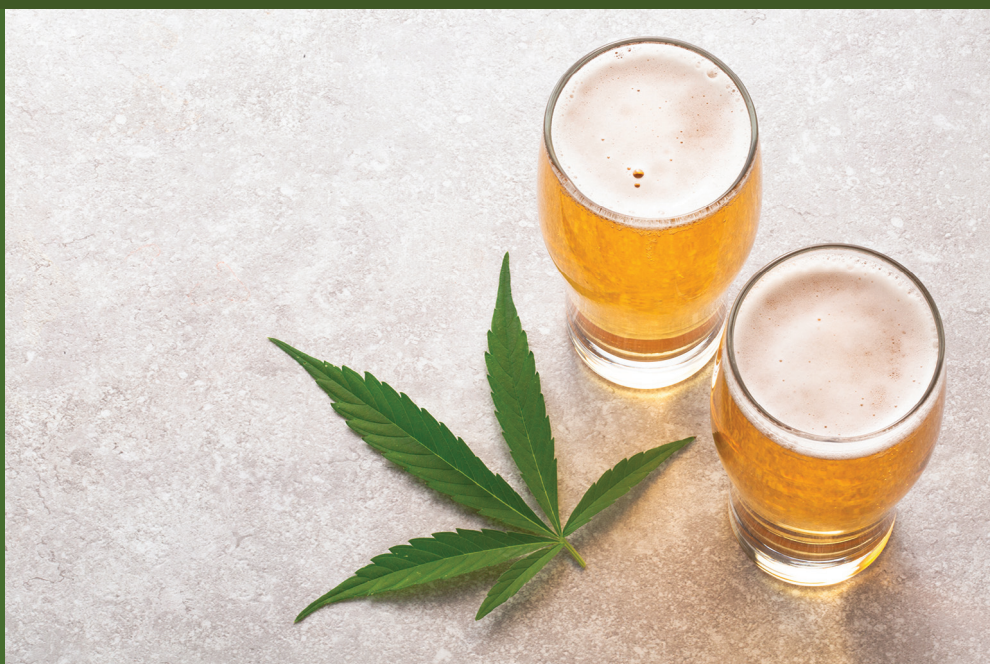

Cannabis Use and the Endocannabinoid System:  
A Clinical Perspective

Prevalence and Correlates of Cannabis Use and  
Cannabis Use Disorder Among U.S. Veterans

The Impact of Alcohol and Other Substance Use  
Disorders on Mortality in Patients With Eating Disorders

Item-Level Genome-Wide Association Study of the  
Alcohol Use Disorders Identification Test in  
Three Population-Based Cohorts

AMERICAN  
PSYCHIATRIC  
ASSOCIATION

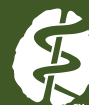

[ajp.psychiatryonline.org](http://ajp.psychiatryonline.org)
